# Supplementary material for: Environmental Drivers of Soil Microbial Diversity and Metabolic Potential Across the Western Himalayan Treeline
Source: Research Square preprint supplement (doi:10.21203/rs.3.rs-7306065/v1), 2025-09-19
Supplement: Supplementary file 1 [file 0fca2609a2b1b186459eca74.docx]

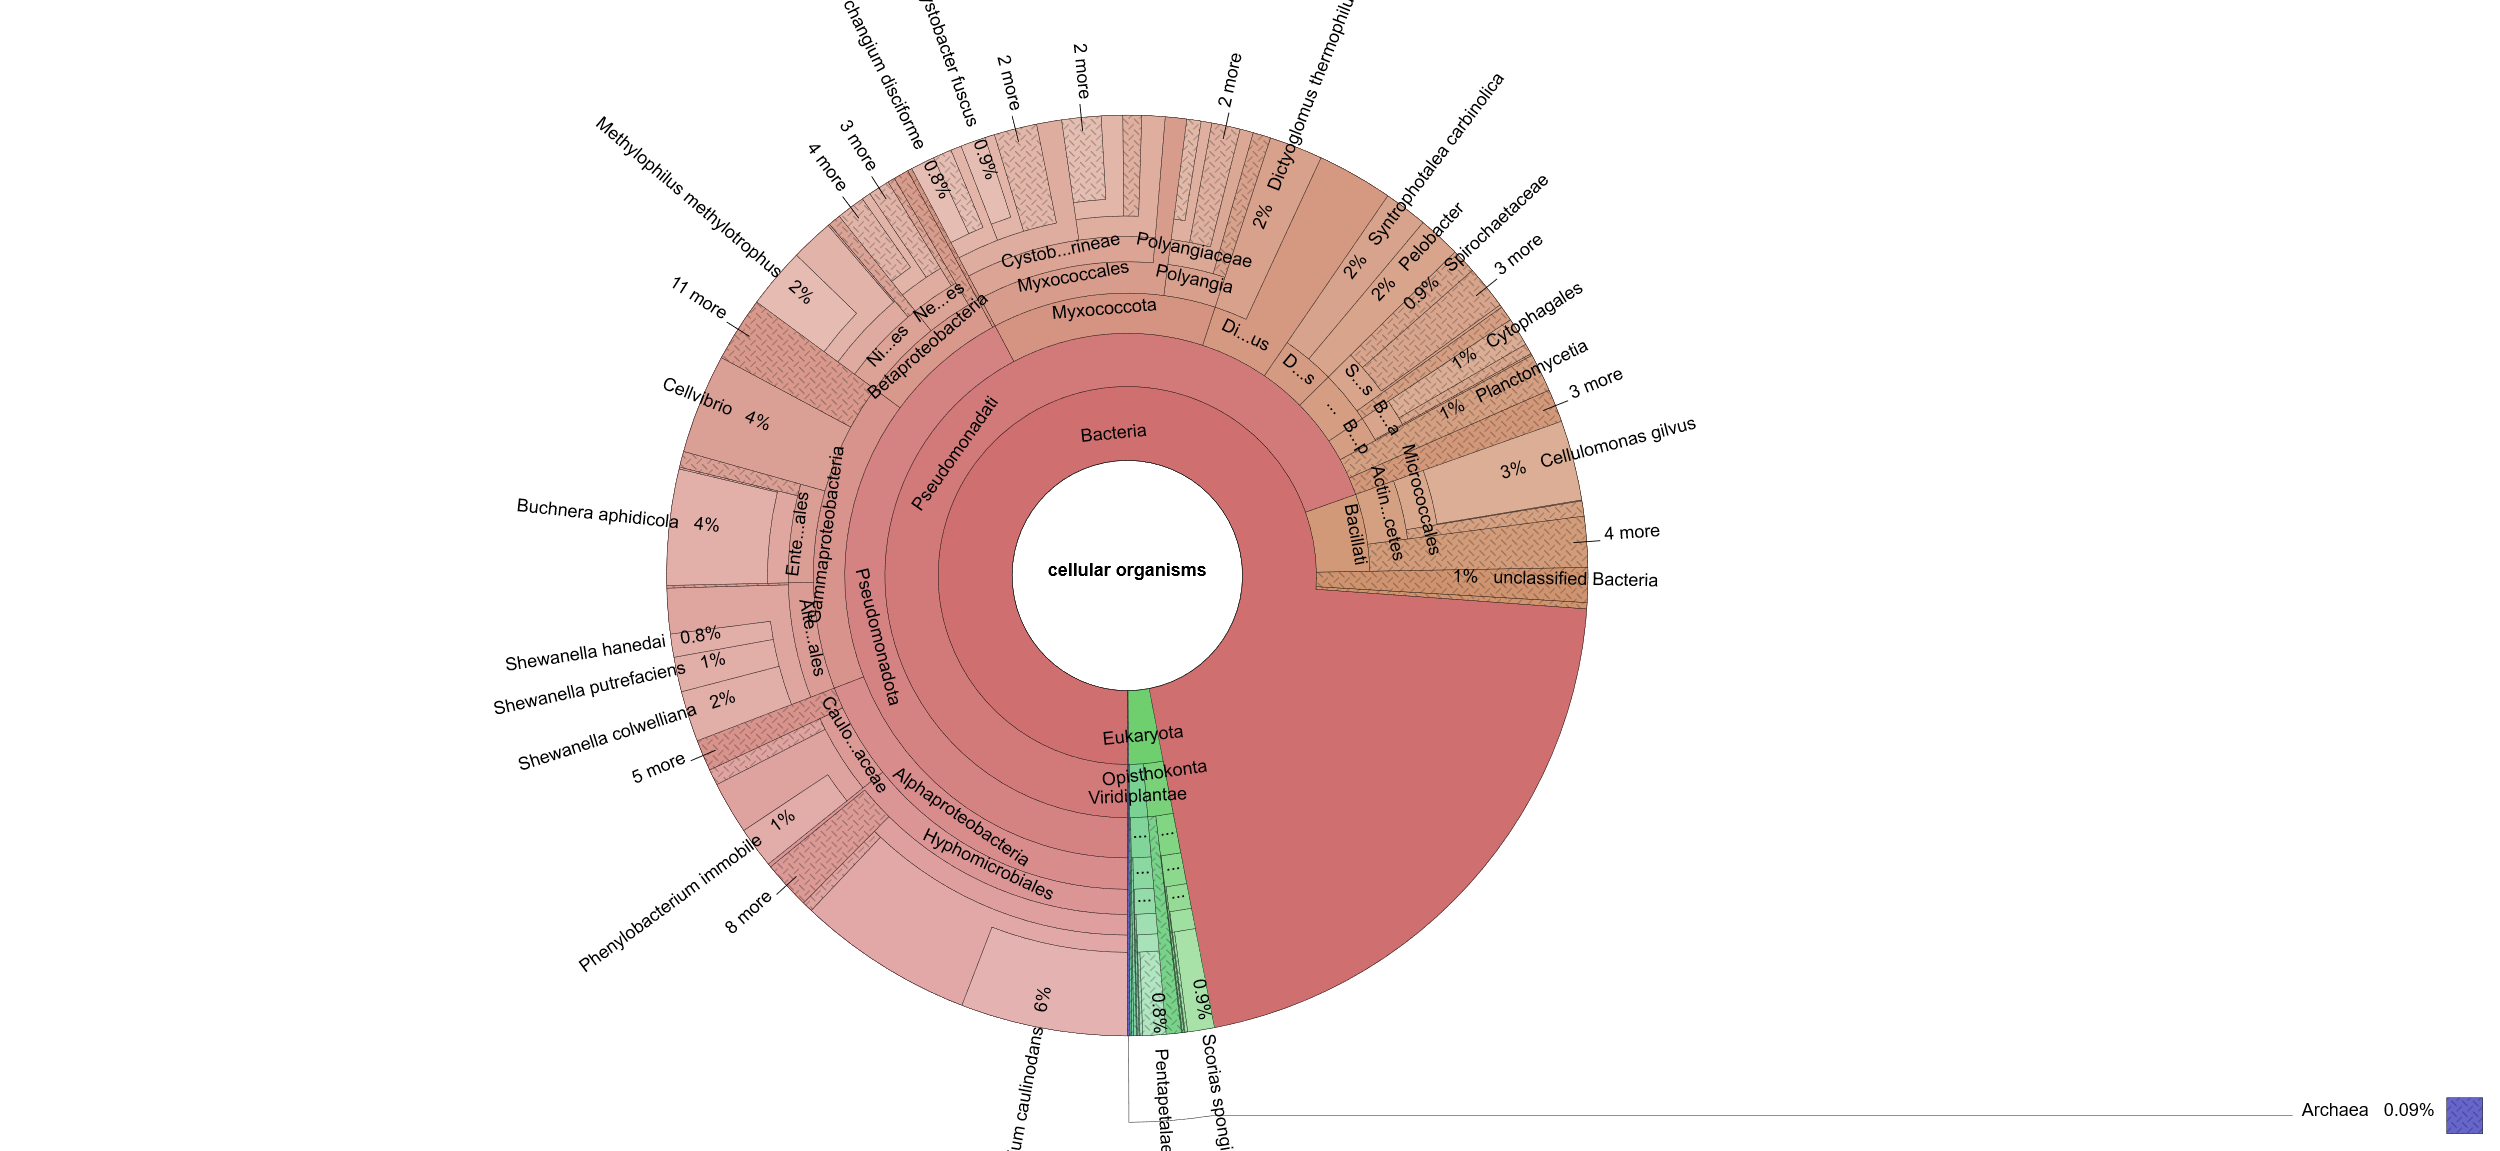


Plot1: Krona plot of S1


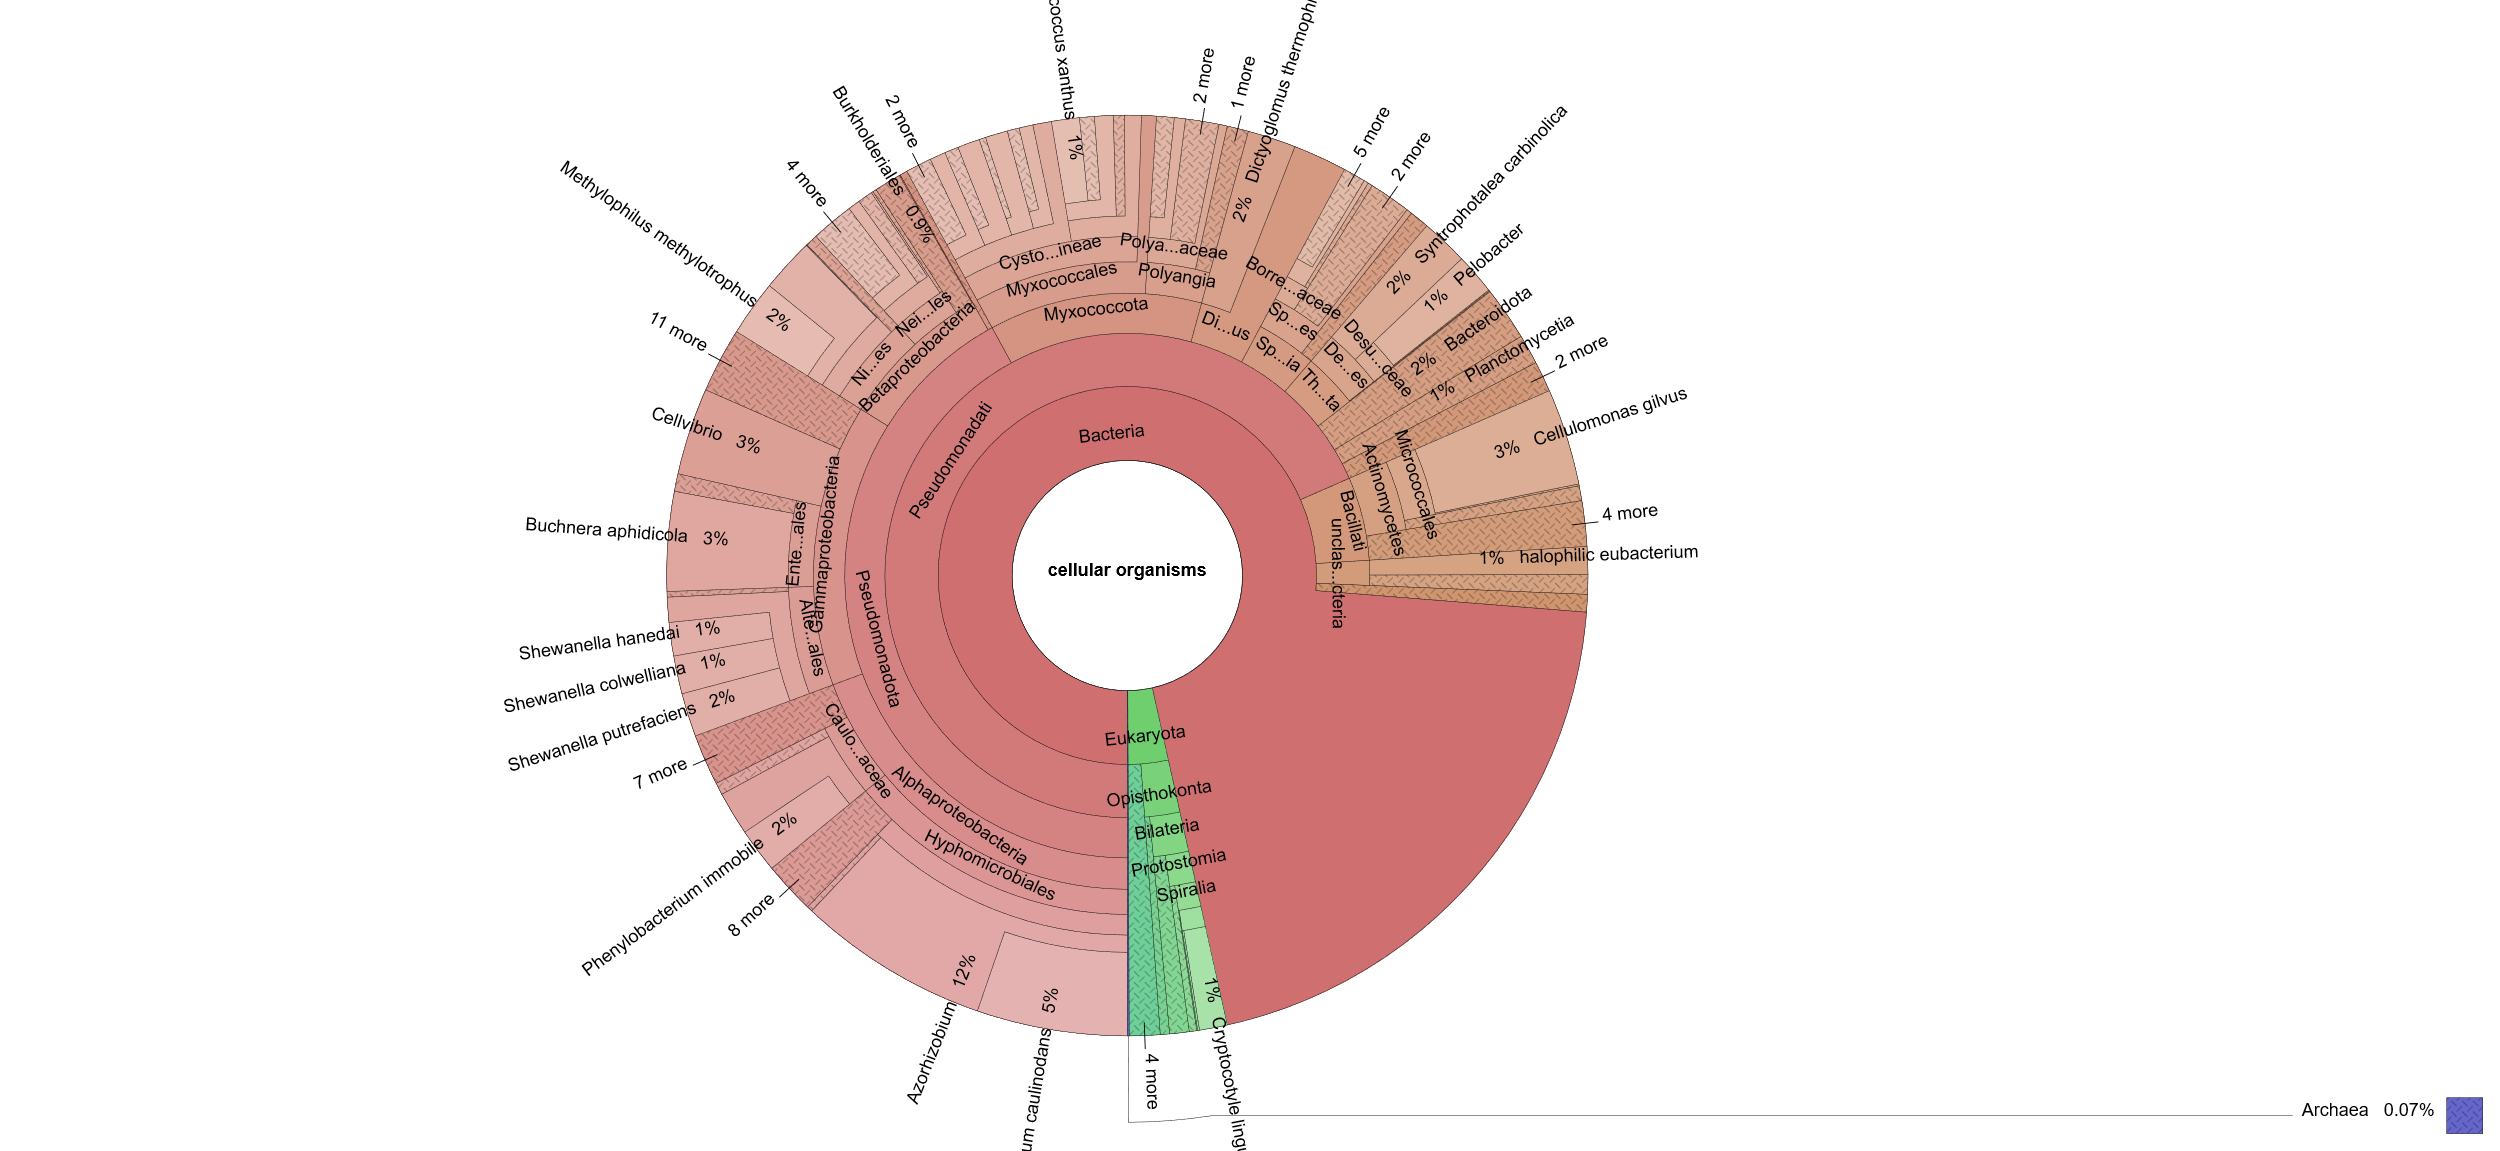


Plot 2: Krona plot of S2


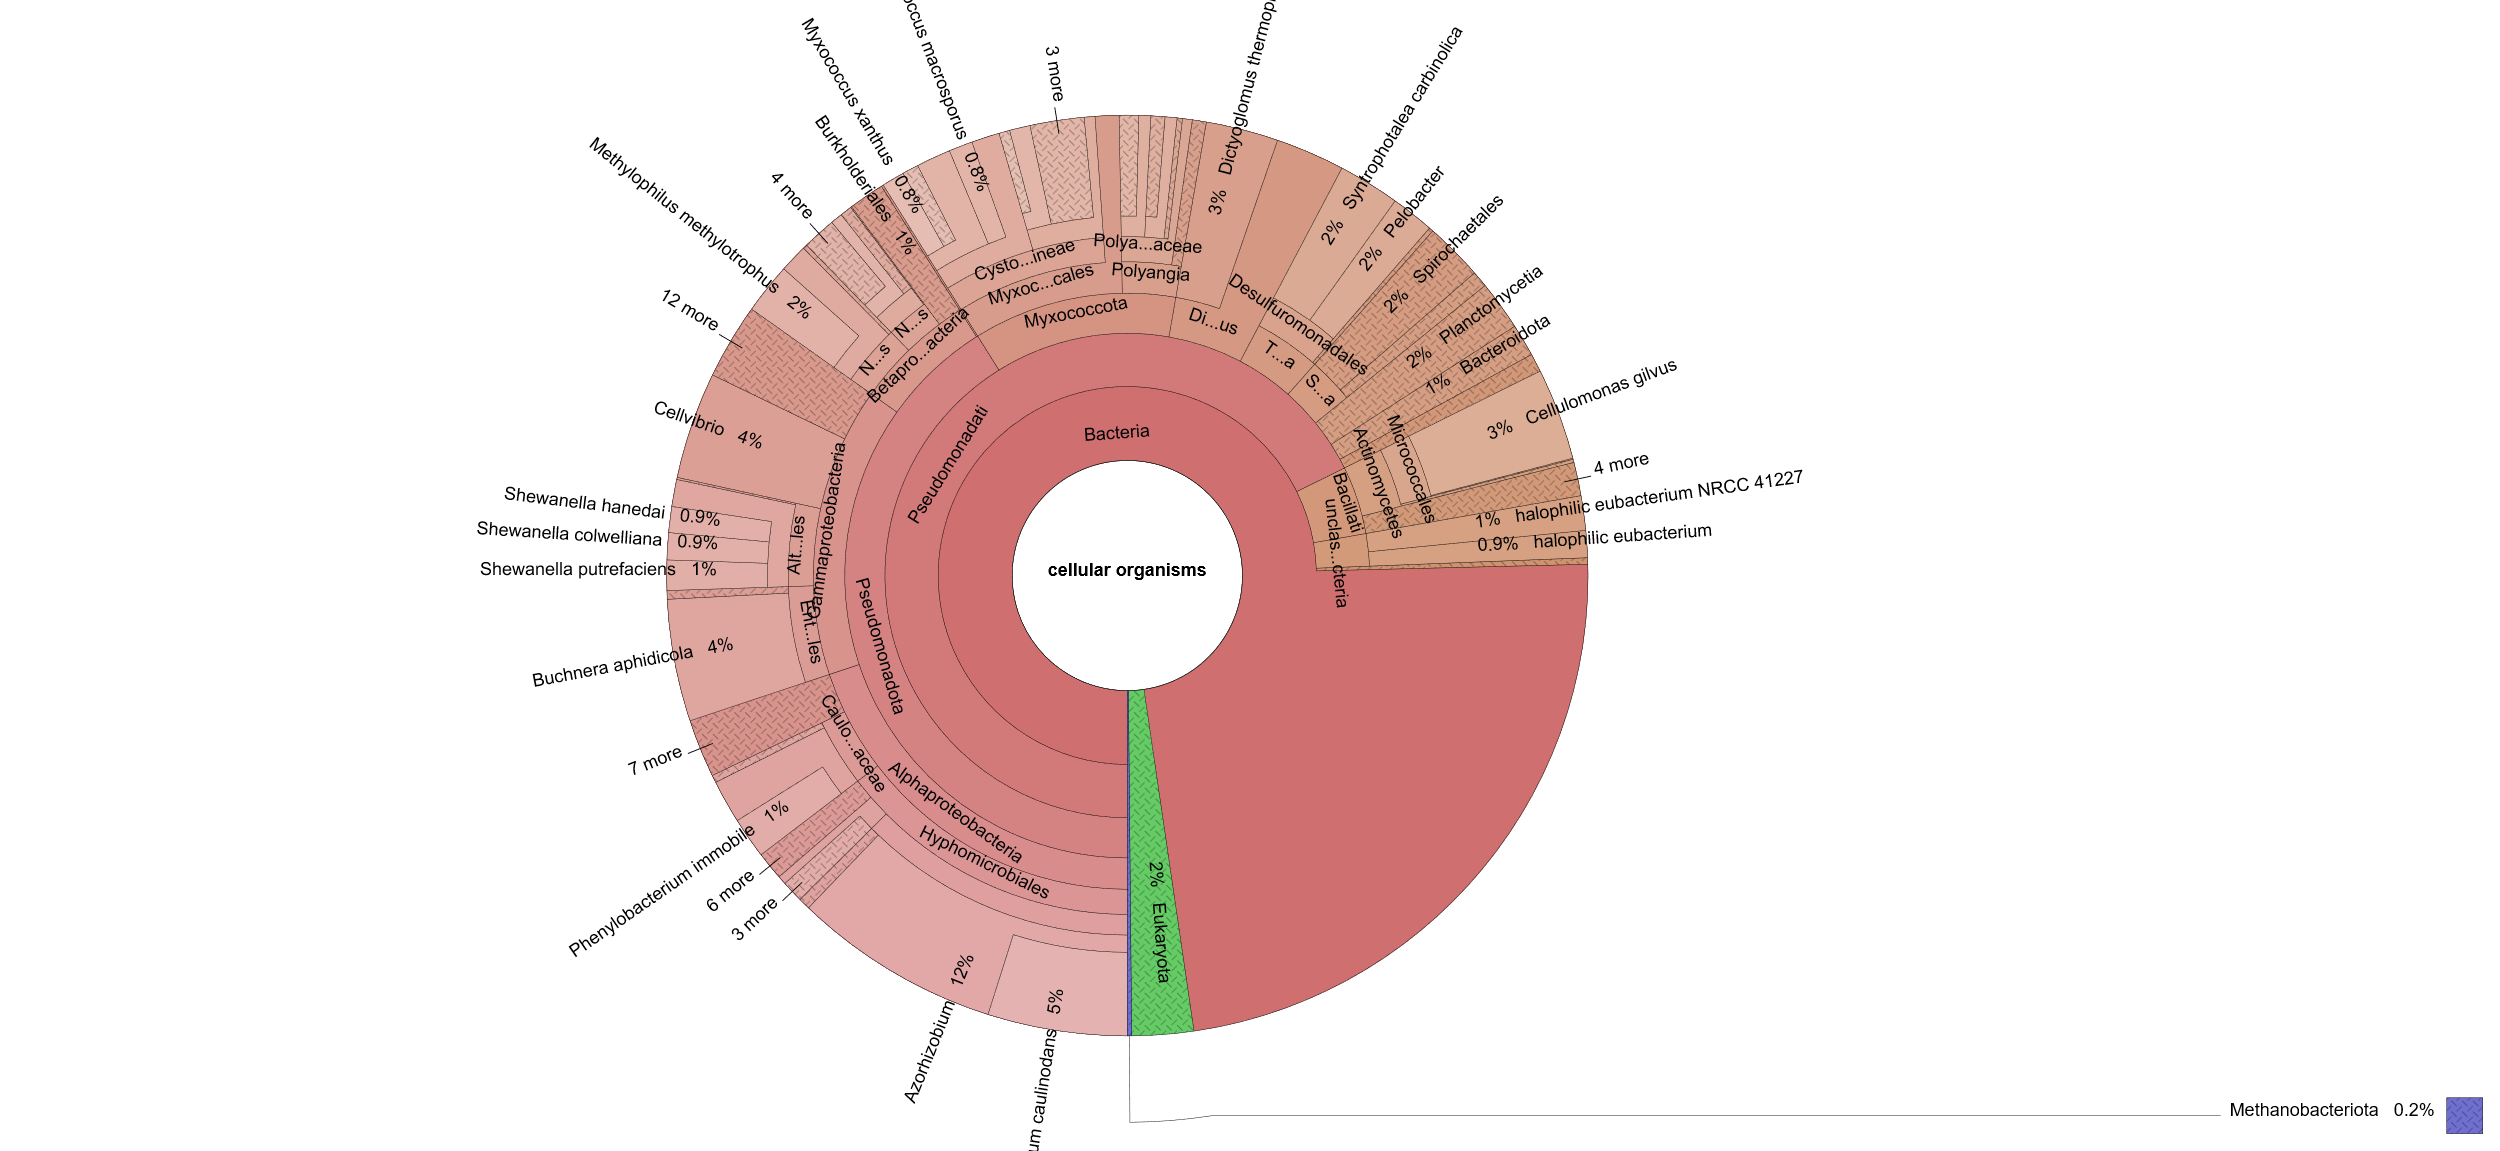


Plot 3: Krona plot of S3


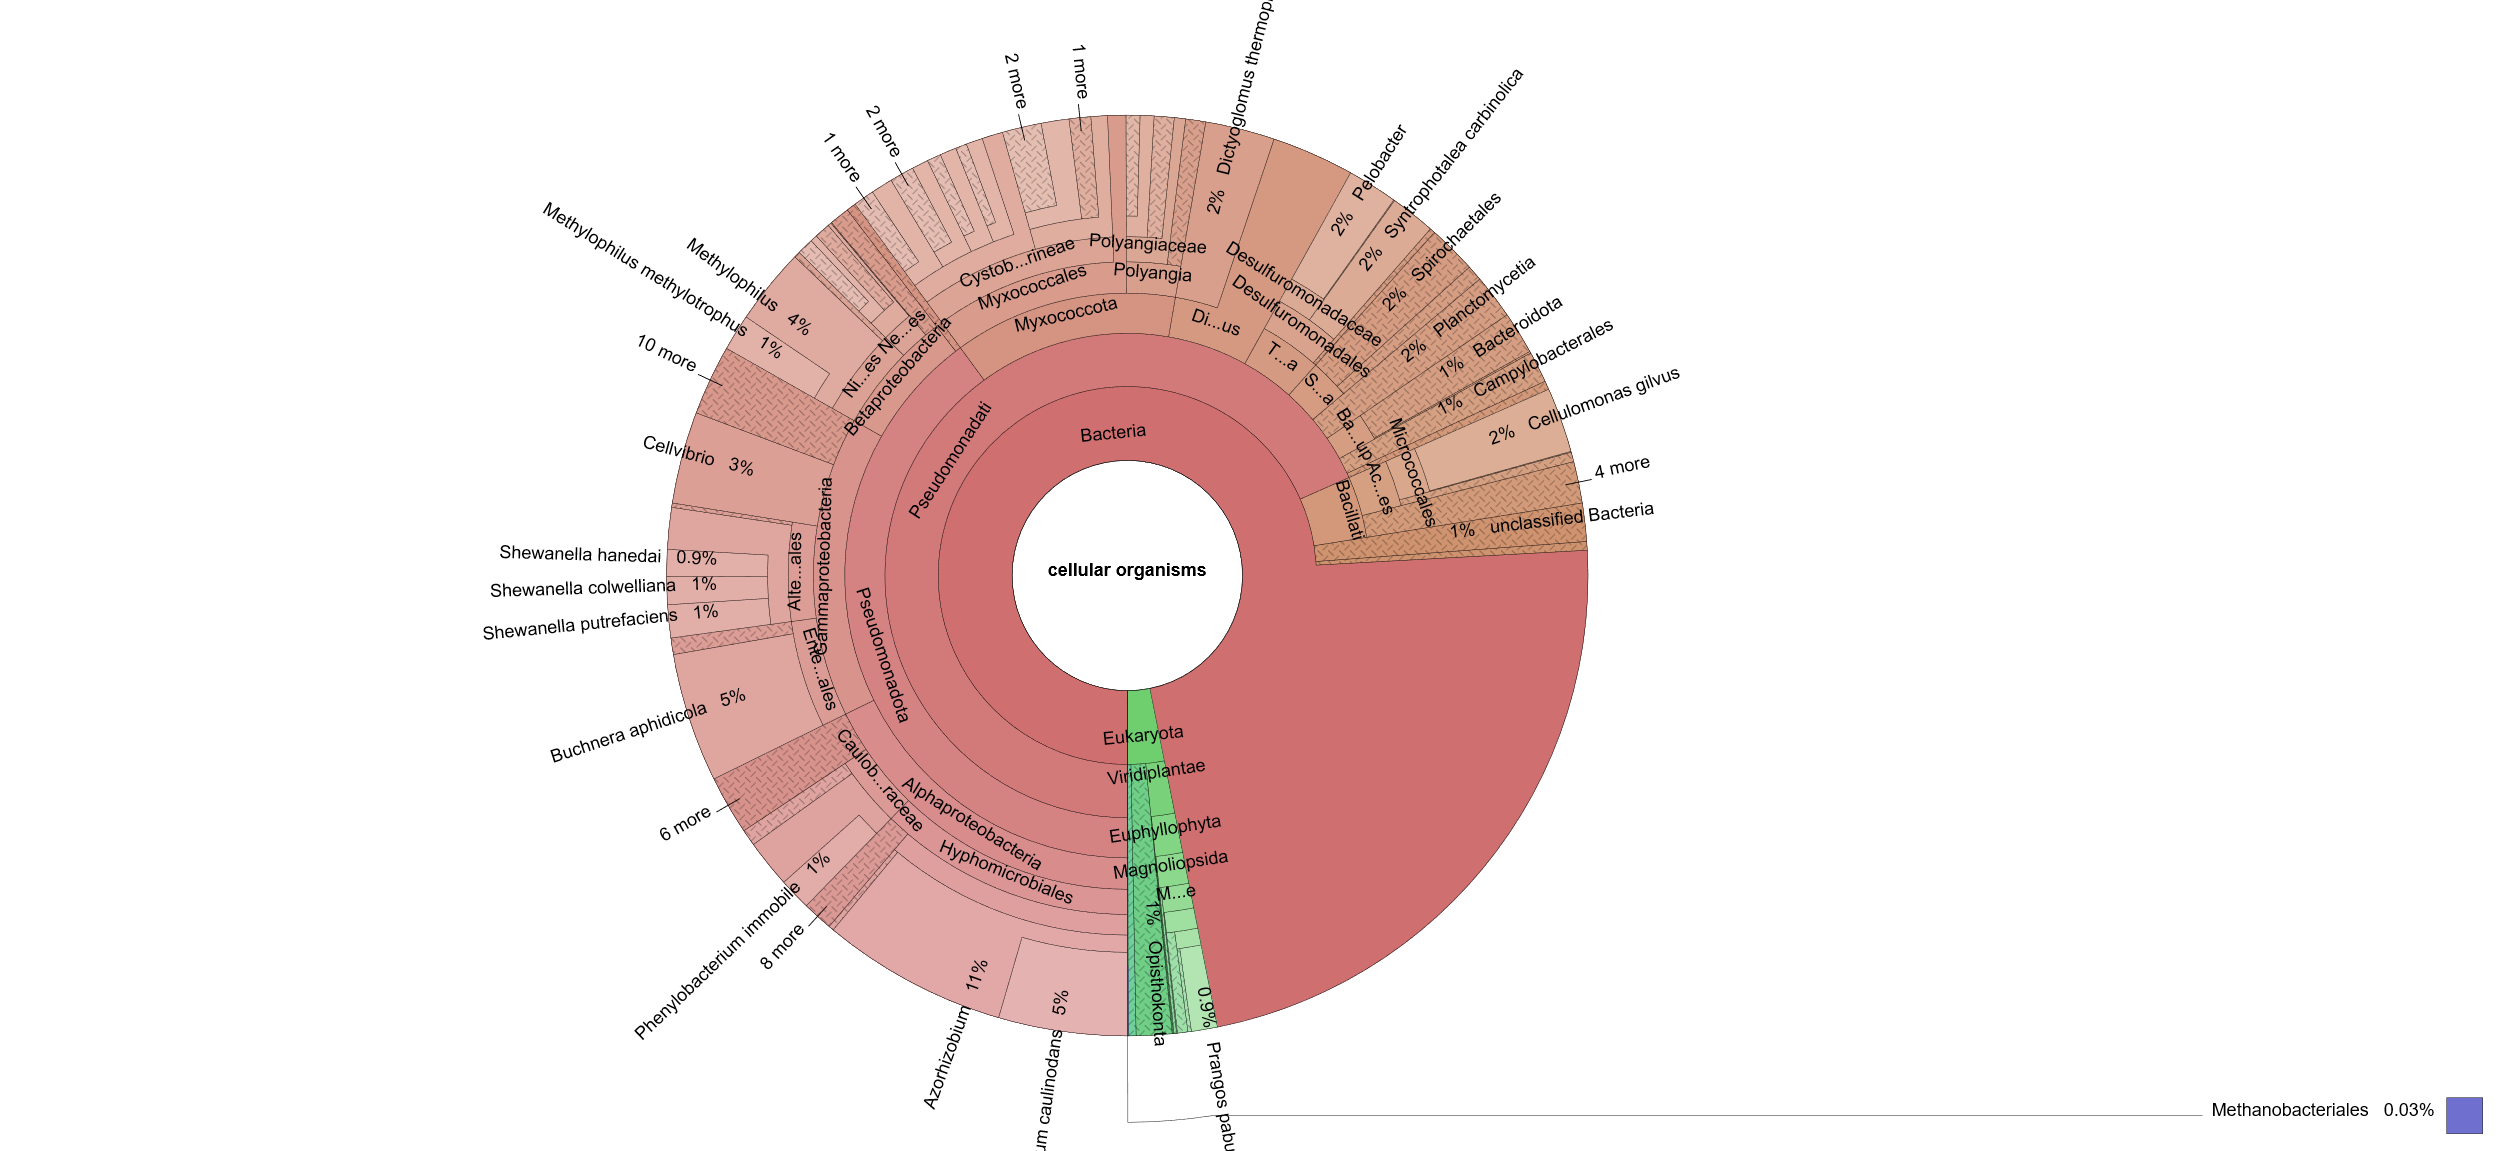


Plot 4: Krona plot of S4


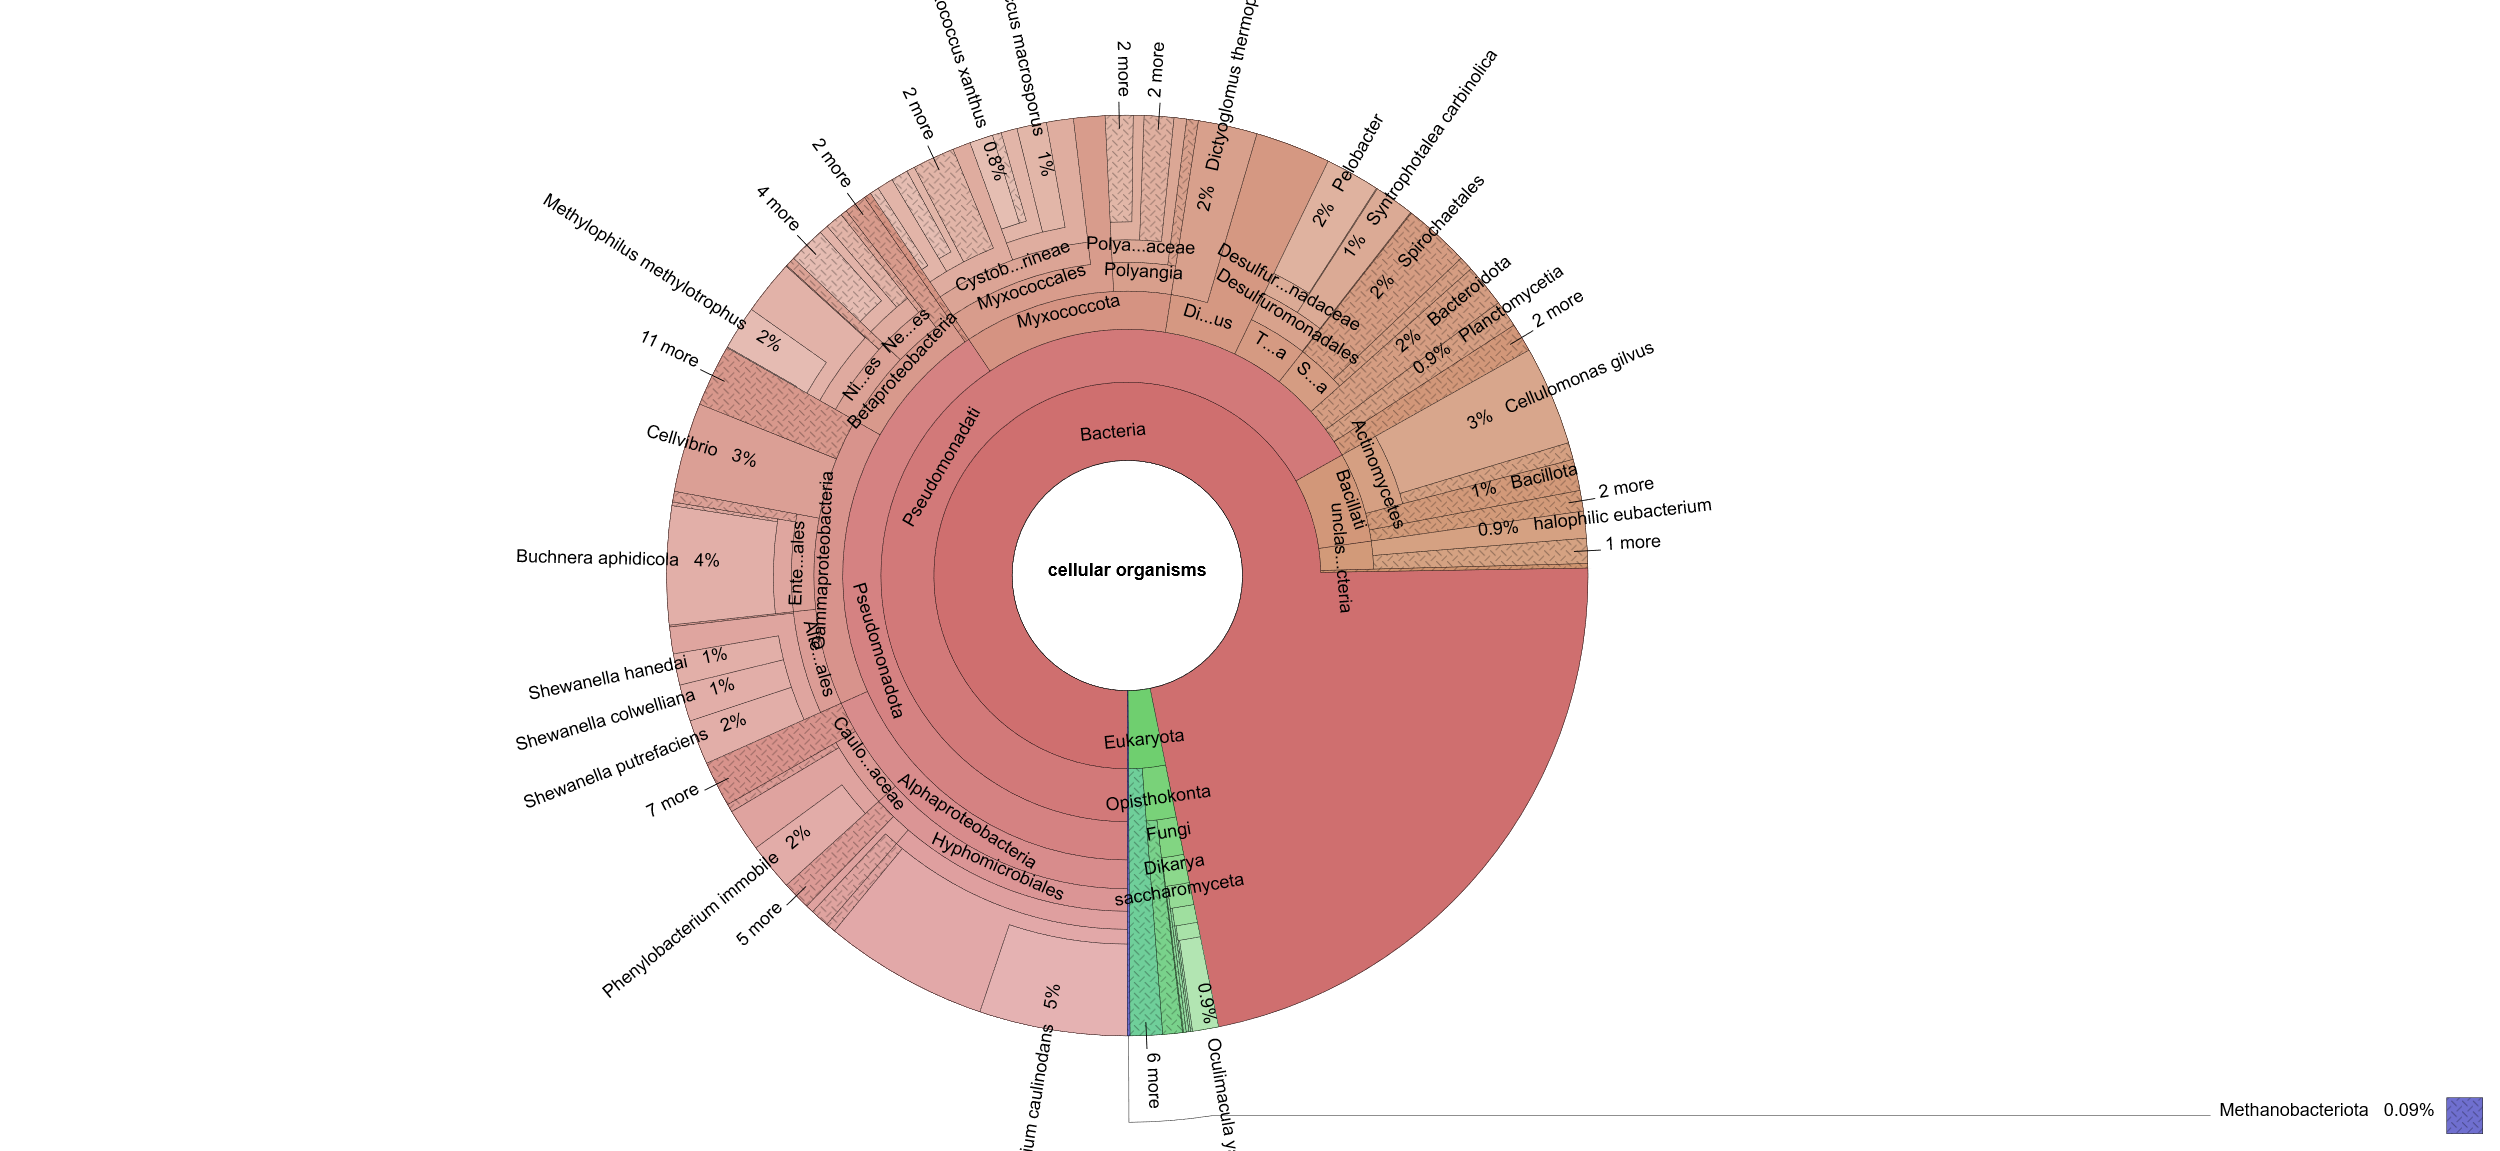


Plot 5: Krona plot of S5
