# Supplementary material for: Environmental Drivers of Soil Microbial Diversity and Metabolic Potential Across the Western Himalayan Treeline
Source: Research Square preprint supplement (doi:10.21203/rs.3.rs-7306065/v1), 2025-09-19
Supplement: Supplementary file 2 [file 99faa4421e52ec1e81a202c8.xlsx]

## Sheet: S1
Table S1: Alpha diversity statistics across the communities
Sample	Shannon	Simpson	Chao1	Observed
S1	3.98	0.88	3262.58	2705
S2	3.34	0.82	3351.03	2734
S3	3.15	0.82	3053.09	2416
S4	2.26	0.6	3320.18	2777
S5	3.91	0.86	3279.84	2752

## Sheet: S2
Table S2: Bacterial community structure across samples
Samples	Phyla	Classes	Orders	Families	Genus	Species
S1	32	66	151	327	997	3079
S2	33	67	154	329	997	3099
S3	30	66	148	308	911	2754
S4	32	70	157	334	1025	3166
S5	31	65	153	329	1000	3125
Community	35	72	170	380	1266	4234

## Sheet: S3
Table S3: Relative abundance (in percentage) of bacterial phyla across five soil samples.
Phylum	Bacillota	Bacteroidota	Planktomycetota	Spirochetota	Actinomycetota	Desulphobacterota	Dictyoglomota	Myxococcota	Psuedomonadota	Others
S1	0.6	1	2	3	3	3	5	13	44	25.4	100
S2	0.8	2	1	4	4	3	4	13	44	24.2	100
S3	0.8	1	2	3	3	4	5	12	42	27.2	100
S4	0.9	2	2	2	3	4	5	13	41	27.1	100
S5	1	2	1	3	4	4	5	12	42	26	100
Average	0.82	1.6	1.6	3	3.4	3.6	4.8	12.6	42.6	25.98	100

## Sheet: S4
Table S4: Relative abundance (in percentage) of bacterial genera across five soil samples.
Genus	Stigmatella	Chondromyces	Vitreoscilla	Archangium	Cystobacter	Syntrophotalea	Pelobacter	Myxococcus	Methylophyllus	Cellulomonas	Cellvibrio	Phenylobacterium	Dictyoglomus	Shewanella	Buchnera	Azorhizobium	Others	Total
S1	0.77	0.9	1.35	1.93	1.26	1.58	1.55	2.19	2.19	2.9	3.61	3.38	4.67	5.58	4.19	12.41	49.53	100
S2	1.05	1.69	1.99	1.52	1.32	1.72	1.48	2.23	3.98	3.51	3.17	3.2	3.71	5.09	3.61	12.45	48.3	100
S3	0.5	1.12	1.63	0.81	1.12	2.21	1.55	2.64	2.83	3.3	3.84	3.03	5.08	3.96	4.38	12.45	49.53	100
S4	1.1	1.01	0.85	1.48	1.54	1.63	1.82	3.8	4.09	2.36	3.33	2.89	5.5	4.68	4.68	11.38	47.86	100
S5	0.91	1.4	1.65	0.91	0.81	1.46	1.98	1.75	3.6	3.6	3.24	3.28	4.87	5.06	4.28	11.32	49.87	100
average	0.86	1.18	1.46	1.44	1.31	1.79	1.6	2.71	3.27	3.02	3.49	3.13	4.74	4.83	4.22	12.17	48.81	100

## Sheet: S5
Table S5: Eukaryotic community structure across samples
Samples	Phyla	Classes	Orders	Families	Genus	Species
S1	7	13	18	24	49	58
S2	8	11	14	21	49	63
S3	8	12	16	20	31	37
S4	9	13	16	22	48	59
S5	8	13	17	22	52	71
Combined	12	21	30	37	101	160

## Sheet: S6
Table S6: Read count data of major eukaryotic groups.
Sample	Fungi	Viridiplantae	Metazoa	Total eukaryotes
S1	37	38	17	94
S2	10	21	61	105
S3	7	26	18	57
S4	18	52	23	102
S5	40	20	22	98

## Sheet: S7
Table S7: Environmental variables- pathways spearman's correlation matrix
	X1CMET2.PWY..folate.transformations.III..E..coli.	ANAEROFRUCAT.PWY..homolactic.fermentation	ANAGLYCOLYSIS.PWY..glycolysis.III..from.glucose.	ARG...SYN..superpathway.of.arginine.and.polyamine.biosynthesis	ARGININE.SYN4.PWY..L.ornithine.biosynthesis.II	ARGSYN.PWY..L.arginine.biosynthesis.I..via.L.ornithine.	ARGSYNBSUB.PWY..L.arginine.biosynthesis.II..acetyl.cycle.	ARO.PWY..chorismate.biosynthesis.I	ASPASN.PWY..superpathway.of.L.aspartate.and.L.asparagine.biosynthesis	BIOTIN.BIOSYNTHESIS.PWY..biotin.biosynthesis.I	BRANCHED.CHAIN.AA.SYN.PWY..superpathway.of.branched.chain.amino.acid.biosynthesis	CALVIN.PWY..Calvin.Benson.Bassham.cycle	CITRULBIO.PWY..L.citrulline.biosynthesis	COA.PWY.1..superpathway.of.coenzyme.A.biosynthesis.III..mammals.	COA.PWY..coenzyme.A.biosynthesis.I..prokaryotic.	COBALSYN.PWY..superpathway.of.adenosylcobalamin.salvage.from.cobinamide.I	COMPLETE.ARO.PWY..superpathway.of.aromatic.amino.acid.biosynthesis	DAPLYSINESYN.PWY..L.lysine.biosynthesis.I	DTDPRHAMSYN.PWY..dTDP..beta..L.rhamnose.biosynthesis	FAO.PWY..fatty.acid..beta..oxidation.I..generic.	FASYN.ELONG.PWY..fatty.acid.elongation....saturated	FERMENTATION.PWY..mixed.acid.fermentation	GLUCONEO.PWY..gluconeogenesis.I	GLUCOSE1PMETAB.PWY..glucose.and.glucose.1.phosphate.degradation	GLUTORN.PWY..L.ornithine.biosynthesis.I	GLYCOGENSYNTH.PWY..glycogen.biosynthesis.I..from.ADP.D.Glucose.	GLYCOLYSIS..glycolysis.I..from.glucose.6.phosphate.	GLYOXYLATE.BYPASS..glyoxylate.cycle	HEME.BIOSYNTHESIS.II.1..heme.b.biosynthesis.V..aerobic.	HEME.BIOSYNTHESIS.II..heme.b.biosynthesis.I..aerobic.	HEMESYN2.PWY..heme.b.biosynthesis.II..oxygen.independent.	HISDEG.PWY..L.histidine.degradation.I	HISTSYN.PWY..L.histidine.biosynthesis	HSERMETANA.PWY..L.methionine.biosynthesis.III	ILEUSYN.PWY..L.isoleucine.biosynthesis.I..from.threonine.	NAGLIPASYN.PWY..lipid.IVA.biosynthesis..E..coli.	NONMEVIPP.PWY..methylerythritol.phosphate.pathway.I	NONOXIPENT.PWY..pentose.phosphate.pathway..non.oxidative.branch..I	OANTIGEN.PWY..O.antigen.building.blocks.biosynthesis..E..coli.	ORNDEG.PWY..superpathway.of.ornithine.degradation	P105.PWY..TCA.cycle.IV..2.oxoglutarate.decarboxylase.	P161.PWY..acetylene.degradation..anaerobic.	P23.PWY..reductive.TCA.cycle.I	P41.PWY..pyruvate.fermentation.to.acetate.and..S..lactate.I	P42.PWY..incomplete.reductive.TCA.cycle	PANTO.PWY..phosphopantothenate.biosynthesis.I	PANTOSYN.PWY..superpathway.of.coenzyme.A.biosynthesis.I..bacteria.	PENTOSE.P.PWY..pentose.phosphate.pathway	PEPTIDOGLYCANSYN.PWY..peptidoglycan.biosynthesis.I..meso.diaminopimelate.containing.
pH	0.0512989	0.353553	-0.111803	-0.111803	-0.447214	-0.1	-0.1	-0.1	0.353553	0.353553	0	-0.359092	-0.1	-0.153897	-0.1	0.353553	-0.1	-0.564288	-0.1	-0.111803	0	-0.447214	-0.111803	0.353553	-0.3	-0.1	-0.111803	-0.111803	-0.111803	-0.111803	-0.111803	0.0512989	0.111803	-0.5	0	0.353553	0	-0.3	0.0512989	-0.9	-0.707107	0.353553	0.353553	0.353553	-0.447214	0.6	0.0512989	-0.3	-0.3
EC	0.410391	0.707107	0.223607	0.223607	-0.223607	0.3	0.3	0.2	0.707107	0.707107	0.3	-0.205196	0.2	0.205196	0.3	0.707107	0.2	-0.410391	0.3	0.223607	0.3	-0.223607	0.223607	0.707107	0.1	0.3	0.223607	0.223607	0.223607	0.223607	0.223607	0.410391	0.447214	-0.3	0.3	0.707107	0.4	0.1	0.410391	-0.8	-0.707107	0.707107	0.707107	0.707107	-0.223607	0.8	0.410391	0.1	0.1
MC	-0.102598	0	0.223607	0.223607	0.33541	0.1	0.1	0.6	0	0	-0.1	-0.102598	0.6	0.102598	0.5	0	0.6	0.102598	0.1	0.223607	-0.1	0.33541	0.223607	0	0.7	0.1	0.223607	0.223607	0.223607	0.223607	0.223607	-0.102598	0.447214	0.1	-0.1	0	0.2	0.3	-0.102598	0.9	0.353553	0	0	0	0.33541	-0.6	-0.102598	0.3	0.7
TOC	-0.359092	-0.707107	-0.894427	-0.894427	-0.782624	-0.4	-0.4	-0.9	-0.707107	-0.707107	-0.6	0.153897	-0.9	-0.666886	-0.5	-0.707107	-0.9	-0.153897	-0.4	-0.894427	-0.6	-0.782624	-0.894427	-0.707107	-0.8	-0.4	-0.894427	-0.894427	-0.894427	-0.894427	-0.894427	-0.359092	-0.67082	0.1	-0.6	-0.707107	-0.3	-0.7	-0.359092	-0.1	-0.353553	-0.707107	-0.707107	-0.707107	-0.782624	-0.1	-0.359092	-0.7	-0.8
N	0.564288	0.353553	-0.111803	-0.111803	-0.447214	0.6	0.6	-0.1	0.353553	0.353553	0.1	0.359092	-0.1	0.153897	0.6	0.353553	-0.1	-0.0512989	0.6	-0.111803	0.1	-0.447214	-0.111803	0.353553	0.2	0.6	-0.111803	-0.111803	-0.111803	-0.111803	-0.111803	0.564288	0.33541	0.4	0.1	0.353553	0.8	0.2	0.564288	-0.1	-0.707107	0.353553	0.353553	0.353553	-0.447214	0.6	0.564288	0.2	0.2
P	-0.615587	-0.707107	-0.894427	-0.894427	-0.782624	-0.5	-0.5	-0.4	-0.707107	-0.707107	-0.9	-0.205196	-0.4	-0.820783	-0.1	-0.707107	-0.4	-0.410391	-0.5	-0.894427	-0.9	-0.782624	-0.894427	-0.707107	-0.3	-0.5	-0.894427	-0.894427	-0.894427	-0.894427	-0.894427	-0.615587	-0.223607	-0.1	-0.9	-0.707107	-0.2	-0.7	-0.615587	0.5	-0.353553	-0.707107	-0.707107	-0.707107	-0.782624	-0.6	-0.615587	-0.7	-0.3
K	-0.564288	-0.353553	0.111803	0.111803	0.447214	-0.6	-0.6	0.1	-0.353553	-0.353553	-0.1	-0.359092	0.1	-0.153897	-0.6	-0.353553	0.1	0.0512989	-0.6	0.111803	-0.1	0.447214	0.111803	-0.353553	-0.2	-0.6	0.111803	0.111803	0.111803	0.111803	0.111803	-0.564288	-0.33541	-0.4	-0.1	-0.353553	-0.8	-0.2	-0.564288	0.1	0.707107	-0.353553	-0.353553	-0.353553	0.447214	-0.6	-0.564288	-0.2	-0.2
S	-0.615587	-0.707107	-0.894427	-0.894427	-0.782624	-0.5	-0.5	-0.4	-0.707107	-0.707107	-0.9	-0.205196	-0.4	-0.820783	-0.1	-0.707107	-0.4	-0.410391	-0.5	-0.894427	-0.9	-0.782624	-0.894427	-0.707107	-0.3	-0.5	-0.894427	-0.894427	-0.894427	-0.894427	-0.894427	-0.615587	-0.223607	-0.1	-0.9	-0.707107	-0.2	-0.7	-0.615587	0.5	-0.353553	-0.707107	-0.707107	-0.707107	-0.782624	-0.6	-0.615587	-0.7	-0.3
Zn	-0.564288	0	-0.447214	-0.447214	-0.67082	-0.5	-0.5	0.3	0	0	-0.7	-0.872082	0.3	-0.666886	0.2	0	0.3	-0.974679	-0.5	-0.447214	-0.7	-0.67082	-0.447214	0	0.1	-0.5	-0.447214	-0.447214	-0.447214	-0.447214	-0.447214	-0.564288	0.447214	-0.8	-0.7	0	-0.1	-0.6	-0.564288	0	-0.707107	0	0	0	-0.67082	-0.3	-0.564288	-0.6	0.1
B	-0.153897	-0.353553	-0.782624	-0.782624	-0.894427	-0.2	-0.2	-0.7	-0.353553	-0.353553	-0.5	0.0512989	-0.7	-0.564288	-0.2	-0.353553	-0.7	-0.359092	-0.2	-0.782624	-0.5	-0.894427	-0.782624	-0.353553	-0.6	-0.2	-0.782624	-0.782624	-0.782624	-0.782624	-0.782624	-0.153897	-0.33541	0	-0.5	-0.353553	0	-0.6	-0.153897	-0.3	-0.707107	-0.353553	-0.353553	-0.353553	-0.894427	0.2	-0.153897	-0.6	-0.6
Fe	-0.205196	0.353553	-0.111803	-0.111803	-0.447214	-0.3	-0.3	0.2	0.353553	0.353553	-0.2	-0.718185	0.2	-0.307794	0	0.353553	0.2	-0.820783	-0.3	-0.111803	-0.2	-0.447214	-0.111803	0.353553	-0.1	-0.3	-0.111803	-0.111803	-0.111803	-0.111803	-0.111803	-0.205196	0.33541	-0.8	-0.2	0.353553	-0.1	-0.4	-0.205196	-0.7	-0.707107	0.353553	0.353553	0.353553	-0.447214	0.3	-0.205196	-0.4	-0.1
Mn	-0.718185	-0.353553	-0.111803	-0.111803	0.111803	-0.6	-0.6	0.4	-0.353553	-0.353553	-0.5	-0.615587	0.4	-0.410391	-0.1	-0.353553	0.4	-0.307794	-0.6	-0.111803	-0.5	0.111803	-0.111803	-0.353553	0.2	-0.6	-0.111803	-0.111803	-0.111803	-0.111803	-0.111803	-0.718185	0.111803	-0.5	-0.5	-0.353553	-0.5	-0.3	-0.718185	0.6	0.353553	-0.353553	-0.353553	-0.353553	0.111803	-0.9	-0.718185	-0.3	0.2
Cu	-0.666886	-0.353553	-0.782624	-0.782624	-0.894427	-0.6	-0.6	-0.1	-0.353553	-0.353553	-0.9	-0.666886	-0.1	-0.872082	0	-0.353553	-0.1	-0.872082	-0.6	-0.782624	-0.9	-0.894427	-0.782624	-0.353553	-0.2	-0.6	-0.782624	-0.782624	-0.782624	-0.782624	-0.782624	-0.666886	0.111803	-0.6	-0.9	-0.353553	-0.2	-0.8	-0.666886	0.1	-0.707107	-0.353553	-0.353553	-0.353553	-0.894427	-0.4	-0.666886	-0.8	-0.2
[truncated: 144 more columns]
